# Supplementary material for: Induction of optical activity in oligosilanes within the internal cavity of cyclodextrins
Source: Royal Society of Chemistry journal article supplement (doi:10.1039/b303771a), 2003-01-01
Supplement: b303771a.doc [file b303771a.doc]

Electronic Supplementary Information

**Induction of Optical Activity in Oligosilanes within the Internal Cavity of Cyclodextrins**

Takanobu Sanji, Akihiko Yoshiwara, Hideki Sakurai, and Masato Tanaka

Chemical Resources Laboratory, Tokyo Institute of Technology and CREST-JST, 4259 Nagatsuta, Midori-ku, Yokohama 226-8503, Japan, and Department of Pure and Applied Chemistry, Tokyo University of Science, Noda, Chiba 278-8510, Japan

**Fig. 1S** Powder X-ray diffraction (XRD) patterns for (a) -CyD, (b) **1**, and (c) **1**/CyD complex.

**Fig. 2S** CP-MAS 13C NMR spectra of (a) -CyD, (b) **1**, and (c) **1**/CyD complex.

**Fig. 3S** CP-MAS 29Si NMR spectra of (a) **1** and (b) **1**/CyD complex.
